# Supplementary material for: Ordered mesoporous carbon supported Ni3V2O8 composites for lithium-ion batteries with long-term and high-rate performance
Source: Royal Society of Chemistry journal article supplement (doi:10.1039/c7ta11268h), 2018-01-01
Supplement: c7ta11268h1.pdf [file c7ta11268h1.pdf]

---

## Supporting Information

---

### **Ordered mesoporous carbon supported $\text{Ni}_3\text{V}_2\text{O}_8$ composites for lithium-ion batteries with long-term and high-rate performance**

*Shiyao Lu, Tianxiang Zhu, Zhaoyang Li, Yuanchao Pang, Lei Shi, Shujiang Ding, Guoxin Gao*

\*

[\*]Mr. S. Y. Lu, Mr. T. X. Zhu, Mr. Z. Y. Li, Miss. Y. C. Pang, Mr. L. Shi, Prof. S. J. Ding and Prof. G. X. Gao

Department of Applied Chemistry, School of Science, Xi'an Jiaotong University, Xi'an 710049, P. R. China

\*Corresponding authors: [gaoguoxin@mail.xjtu.edu.cn](mailto:gaoguoxin@mail.xjtu.edu.cn) (G. X. Gao),

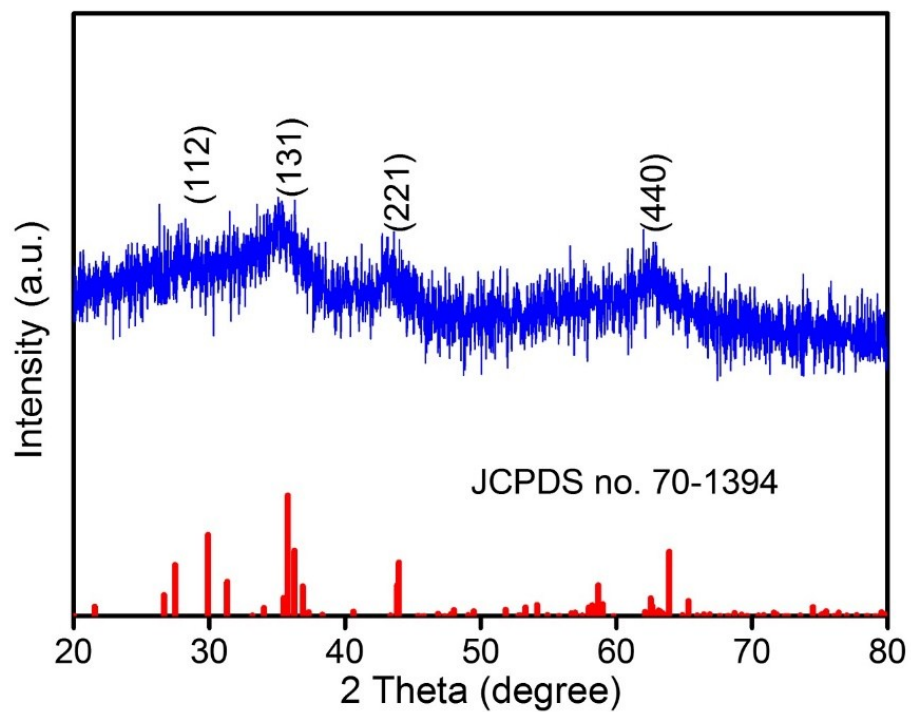

**Figure S1.** XRD pattern of the NiV-precursor@CMK-3.

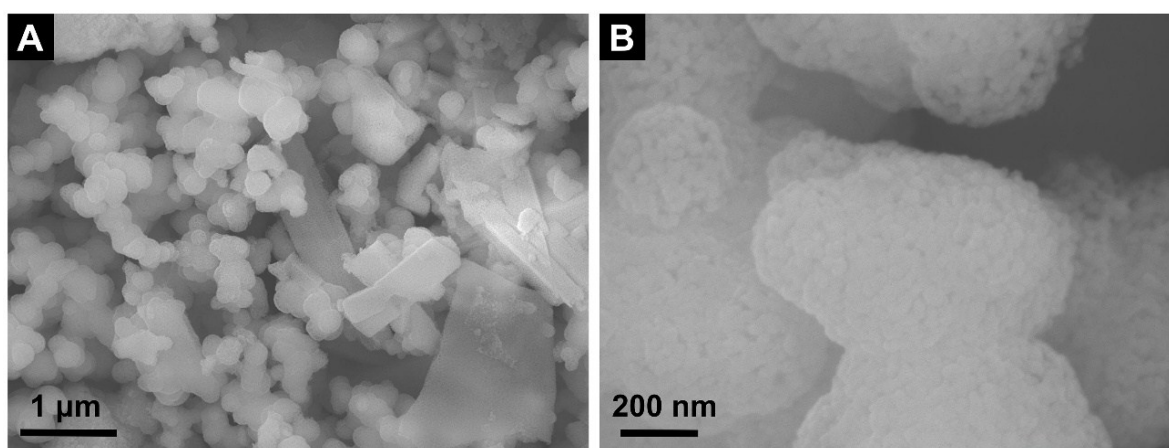

**Figure S2.** FESEM images of pristine  $\text{Ni}_3\text{V}_2\text{O}_8$  aggregates.

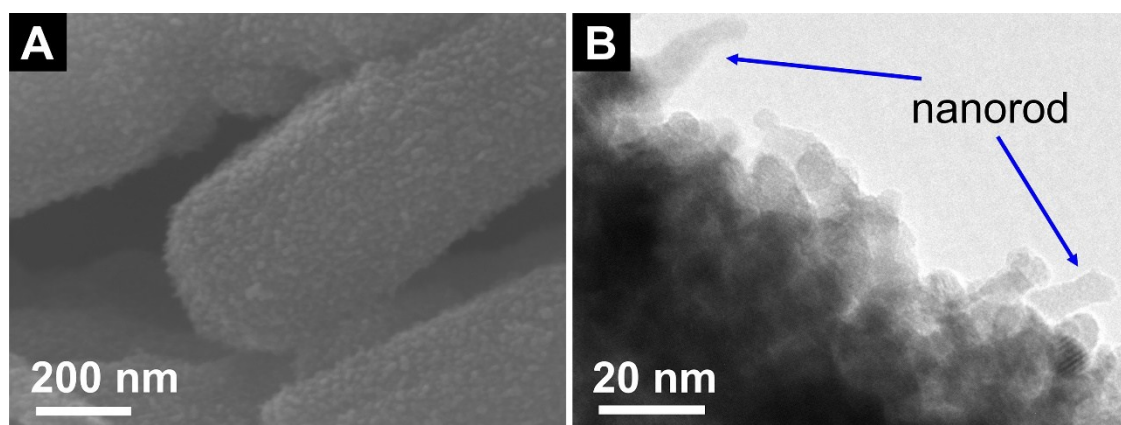

**Figure S3.** FESEM images (A) HRTEM images (B) of  $\text{Ni}_3\text{V}_2\text{O}_8@\text{CMK-3}$  composites.

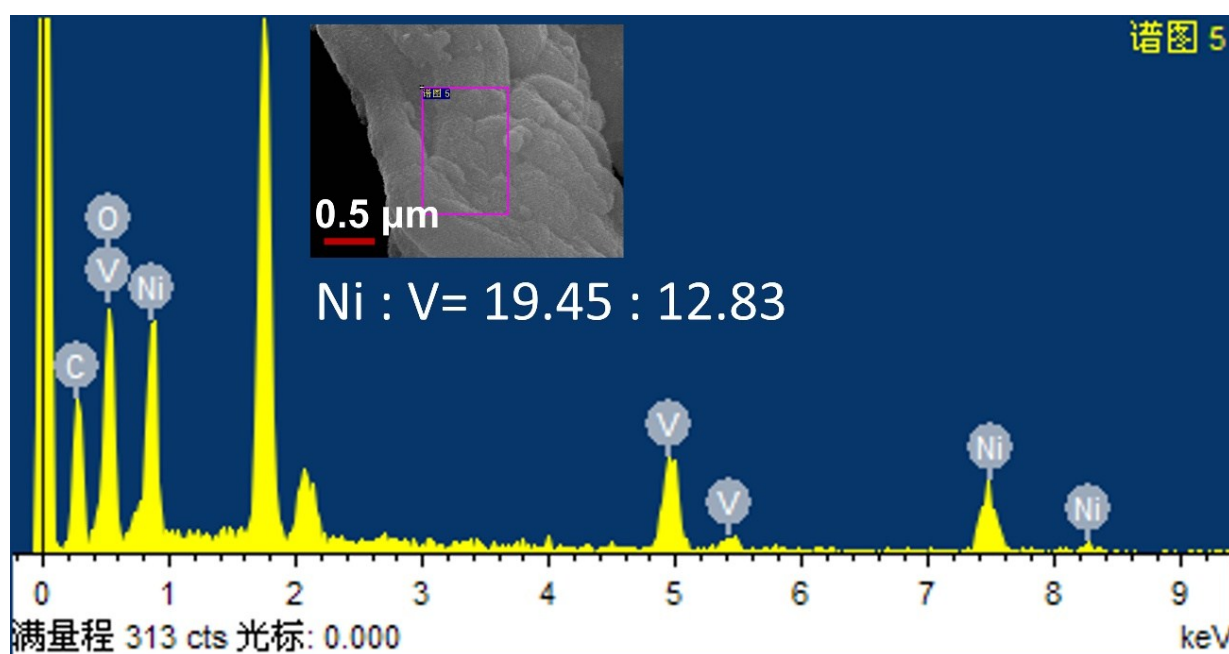

**Figure S4.** EDX pattern of as-prepared  $\text{Ni}_3\text{V}_2\text{O}_8@\text{CMK-3}$  composites.

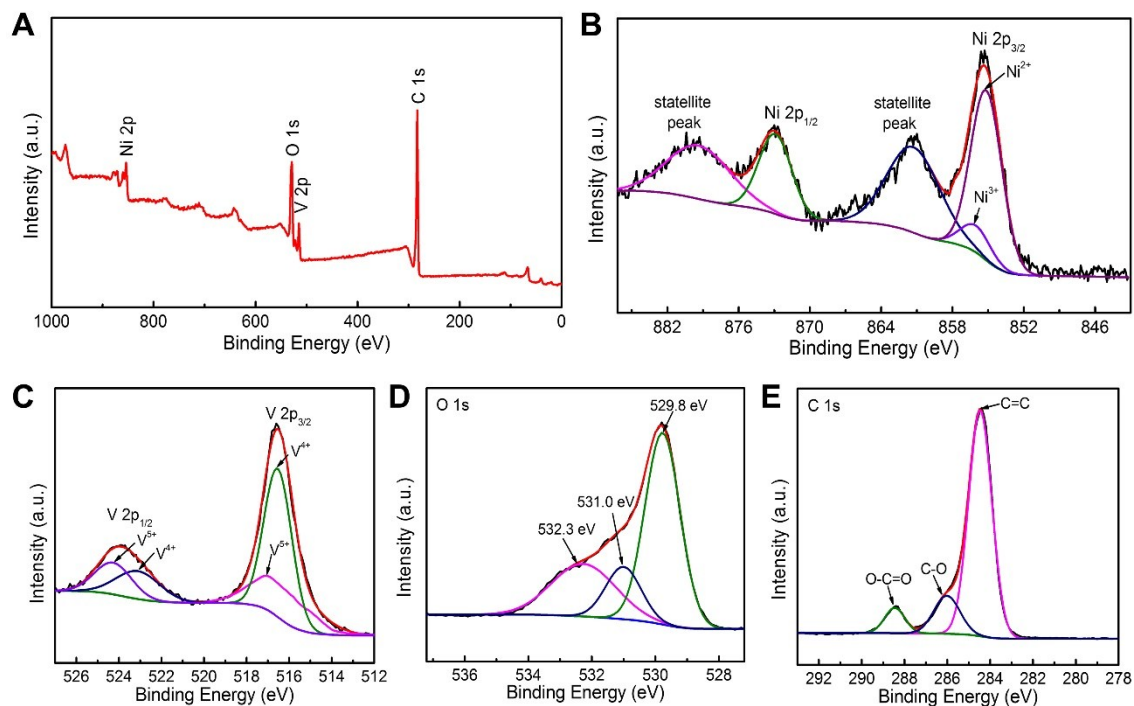

**Figure S5.** XPS spectra of as-prepared  $\text{Ni}_3\text{V}_2\text{O}_8@\text{CMK-3}$  composites: (A) survey, (B) Ni 2p, (C) V 2p, (D) O 1s and (E) C 1s.

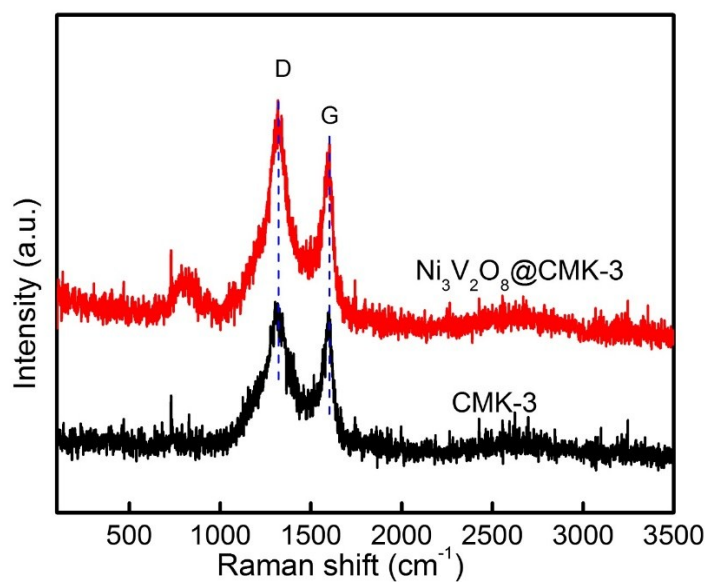

**Figure S6.** Raman spectroscopy of CMK-3 and the as-prepared  $\text{Ni}_3\text{V}_2\text{O}_8@\text{CMK-3}$  composites.



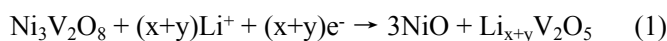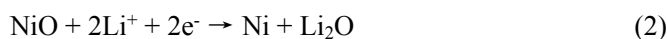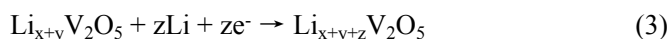

Among these reactions, Reaction 1 is irreversible because the decomposition and deconstruction of the crystal structure of  $\text{Ni}_3\text{V}_2\text{O}_8$ .

The total reversible reaction is:  $\text{NiO} + \text{Li}_x\text{V}_2\text{O}_5 + (y+z+2)\text{Li}^+ + (y+z+2)\text{e}^- \rightarrow \text{Ni} + \text{Li}_2\text{O} + \text{Li}_{x+y+z}\text{V}_2\text{O}_5$ .

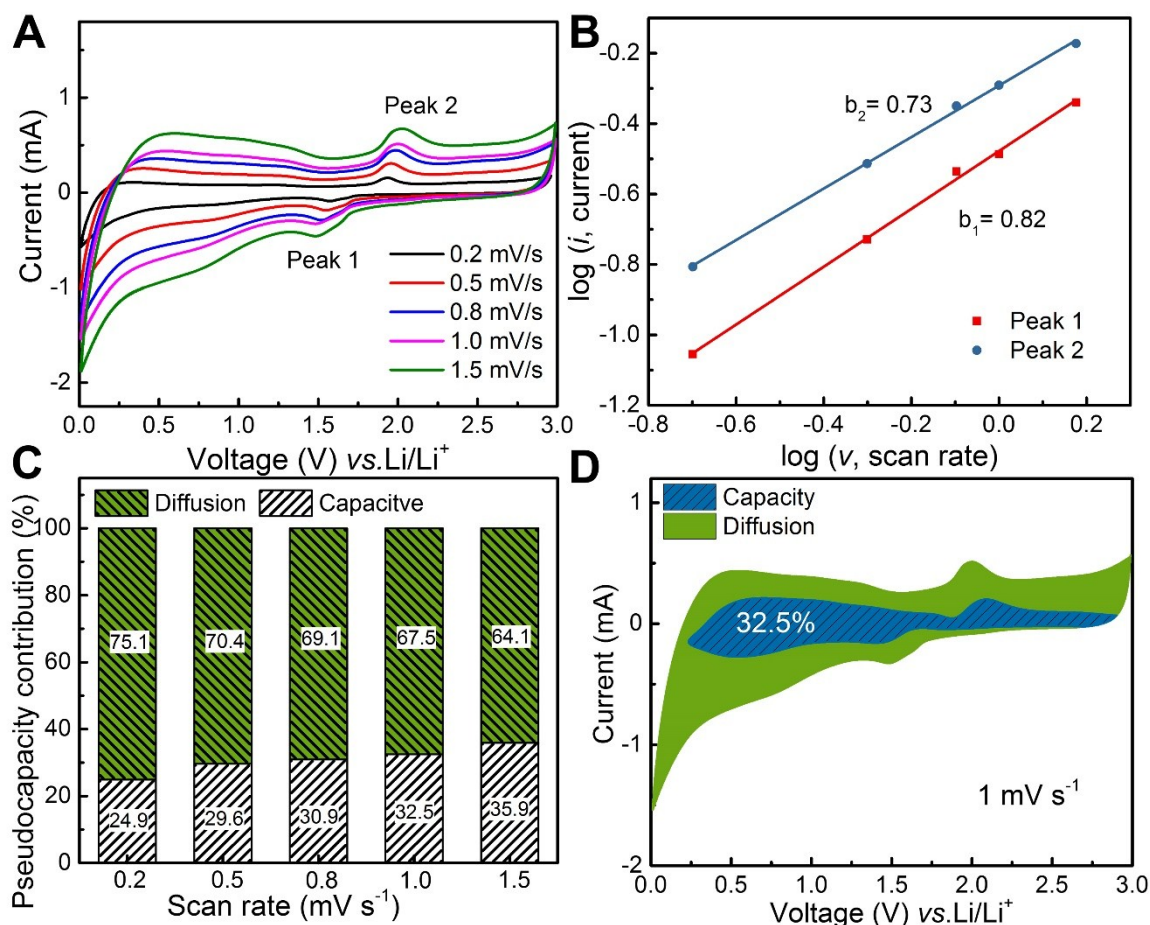

**Figure S9.** Pseudocapacitive behaviors of pure CMK-3 electrodes: (A) CV curves at different scan rates ranging from 0.2 to 1.5 mV s<sup>-1</sup>; (B) corresponding log (*i*) vs. log (*v*) plots at each redox peak (*i*: peak current; *v*: scan rate); (C) bar chart showing the percent of pseudocapacitive contribution at different scan rates; and (D) CV curves with the pseudocapacitive fraction shown by the dark blue region at a scan rate of 1.0 mV s<sup>-1</sup>.



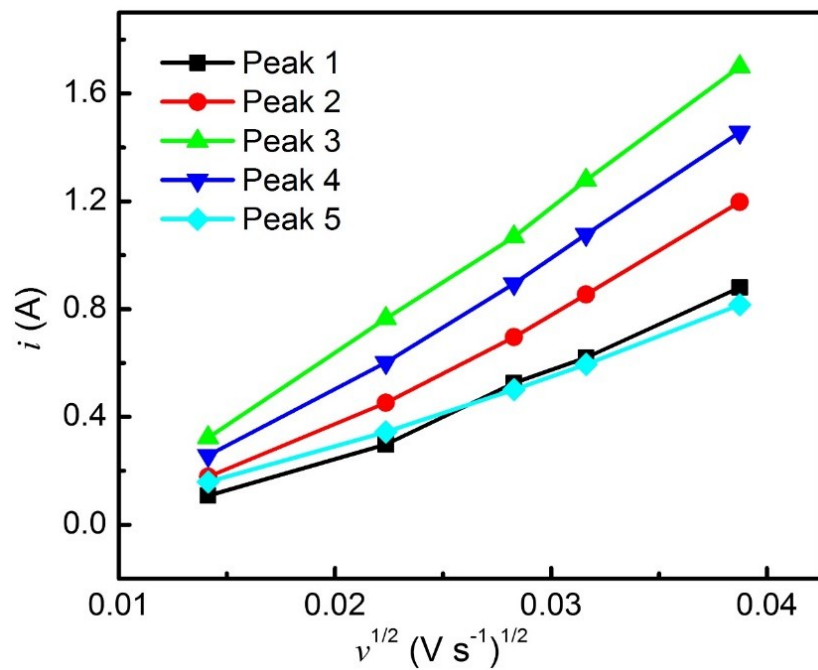

**Figure S10.**  $i$  vs.  $v^{0.5}$  plots at each redox peak of CV curves of  $\text{Ni}_3\text{V}_2\text{O}_8@\text{CMK-3}$  electrodes. ( $i$ : peak current;  $v$ : scan rate).

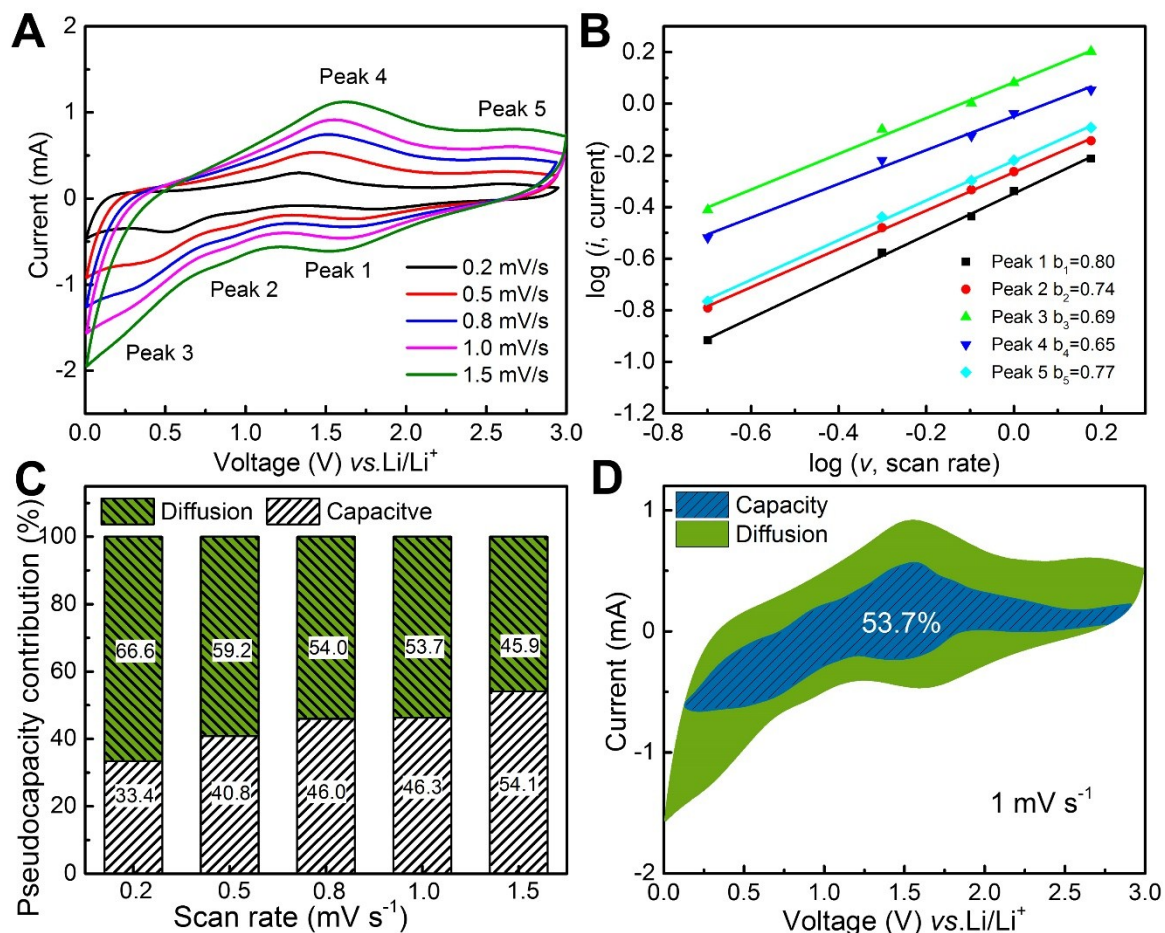

**Figure S11.** Pseudocapacitive behaviors of pure Ni<sub>3</sub>V<sub>2</sub>O<sub>8</sub> aggregates electrodes: (A) CV curves at different scan rates ranging from 0.2 to 1.5 mV s<sup>-1</sup>; (B) corresponding log (*i*) vs. log (*v*) plots at each redox peak (*i*: peak current; *v*: scan rate); (C) bar chart showing the percent of pseudocapacitive contribution at different scan rates; and (D) CV curves with the pseudocapacitive fraction shown by the dark blue region at a scan rate of 1.0 mV s<sup>-1</sup>.



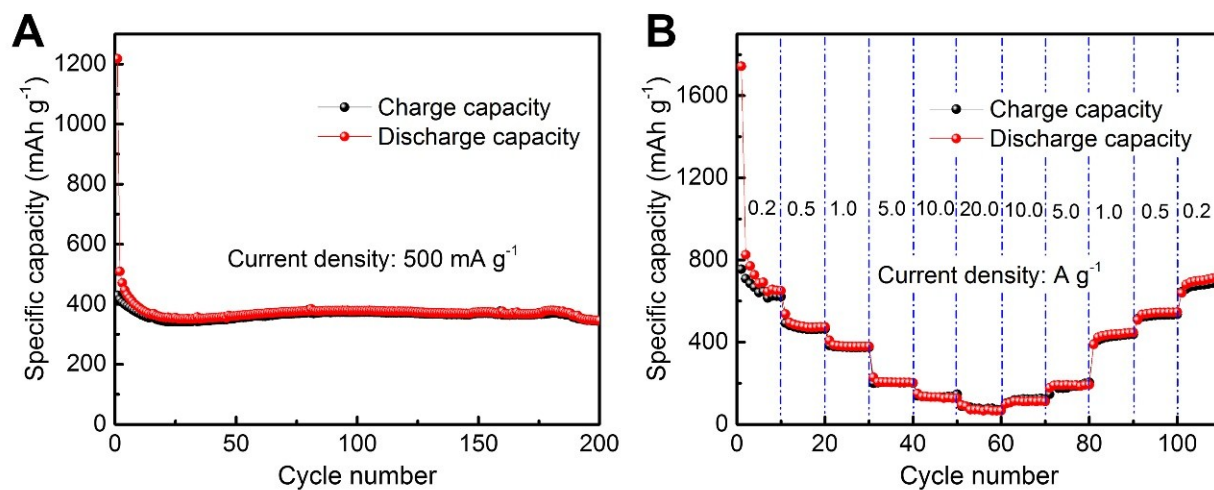

**Figure S12.** Cyclic stability (A) and rate capability (B) of pure CMK-3.

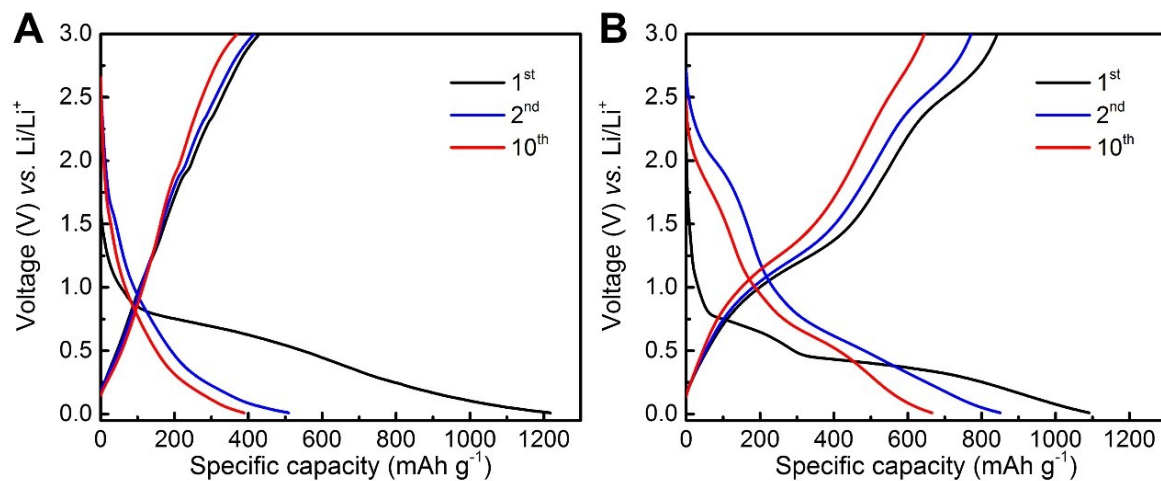

**Figure S13.** Charge/discharge voltage profiles of (A) pure CMK-3 and (B)  $\text{Ni}_3\text{V}_2\text{O}_8$  aggregates.

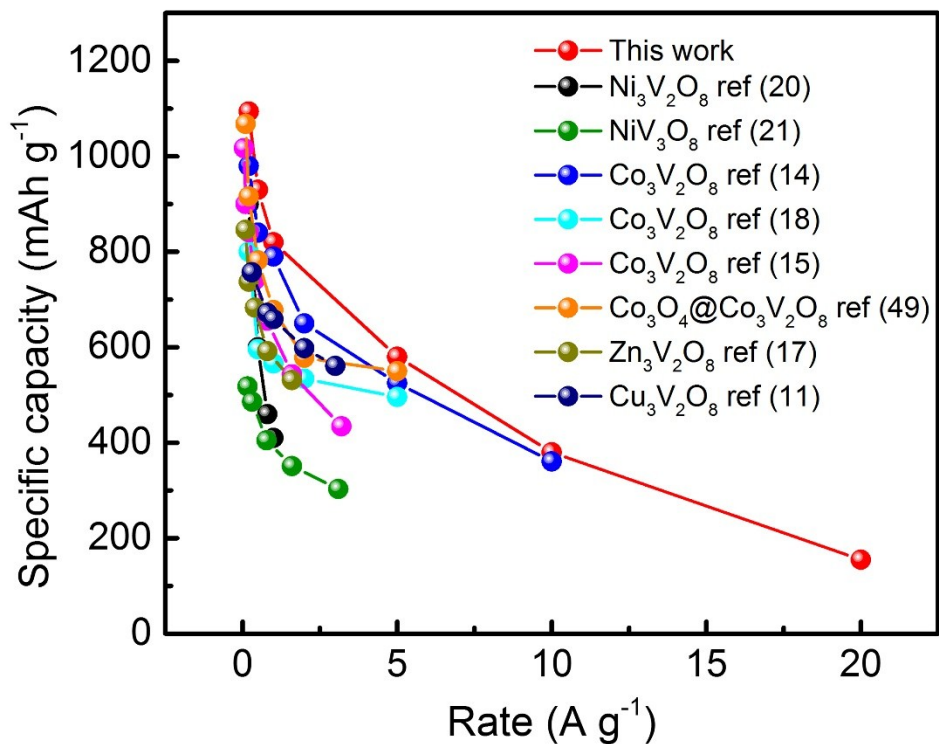

**Figure S14.** Comparison of rate performance with other ternary metal vanadates for LIBs.

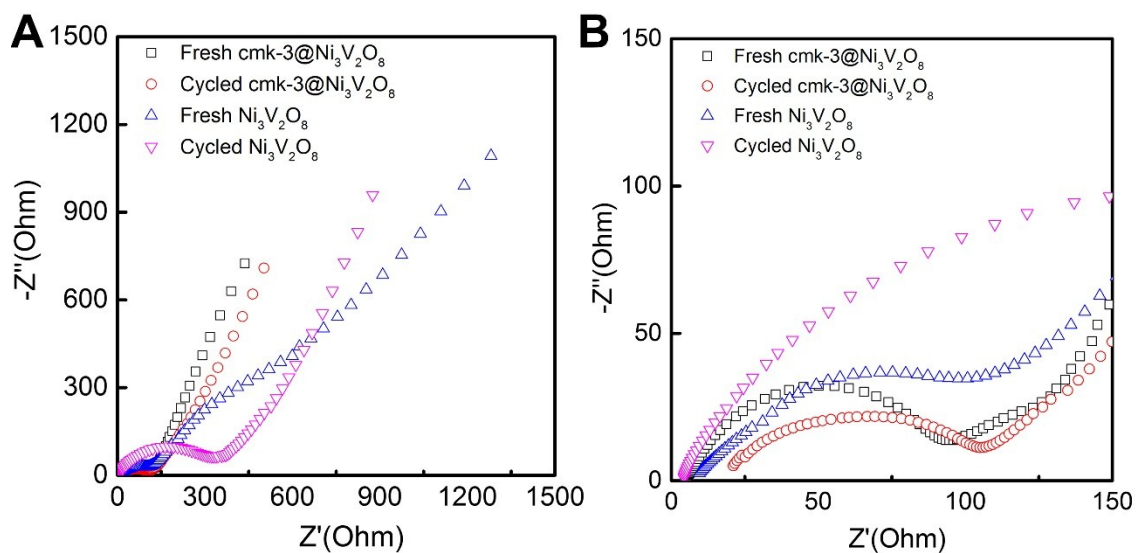

**Figure S15.** Full part (A) and amplified part (B) Nyquist plots of  $\text{Ni}_3\text{V}_2\text{O}_8@\text{CMK-3}$  and pristine  $\text{Ni}_3\text{V}_2\text{O}_8$  aggregates electrodes in fresh states and states after 100 cycles measured with an amplitude of 5.0 mV over the frequency range of 100 kHz and 0.01 Hz by applying a sine wave.
